# Supplementary material for: Accelerating Fe(iii)/Fe(ii) redox cycling by Zn0 in micro-nano dendritic Fe–Zn alloy for enhanced Fenton-like degradation of phenol
Source: Royal Society of Chemistry journal article supplement (doi:10.1039/d3nj03175f), 2023-01-01
Supplement: d3nj03175f1.pdf [file d3nj03175f1.pdf]

Supporting information

**Accelerating Fe(III)/Fe(II) redox cycling by Zn<sup>0</sup> in micro-nano dendritic Fe-Zn alloy for enhanced Fenton-like degradation of phenol**

Yue Hao<sup>1,2</sup>, Jiankang Wang<sup>3</sup>, Qixing Xia<sup>4</sup>, Xiao Zhang<sup>1</sup>, Ying Song<sup>1</sup>, Zhongping Yao<sup>\*,1</sup>

<sup>1</sup>School of Chemistry and Chemical Engineering, State Key Laboratory of Urban Water Resource and Environment, Harbin Institute of Technology, Harbin 150001, China

<sup>2</sup>Hefei General Machinery Research Institute, Hefei 230031, China

<sup>3</sup>College of Materials Science and Engineering, Yangtze Normal University, Chongqing 408100, China

<sup>4</sup>Institute of Culture and Heritage, Northwestern Polytechnical University, Xi'an 710072, China

*\*Corresponding authors.*

[yaozhongping@hit.edu.cn](mailto:yaozhongping@hit.edu.cn) (Z. Yao)

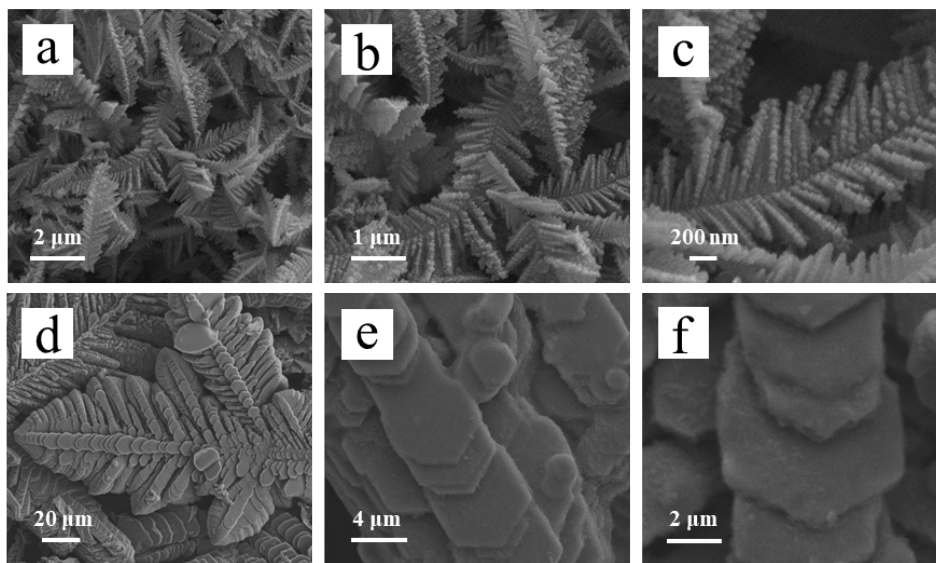

**Fig. S1** SEM images of (a-c) ZVI and (d-f) ZVZ.

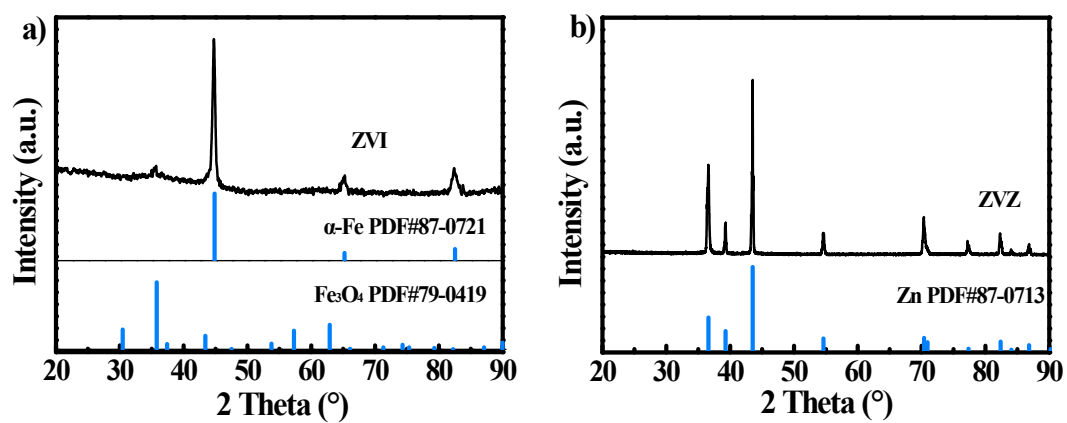

**Fig. S2** XRD patterns of (a) ZVI and (b) ZVZ.

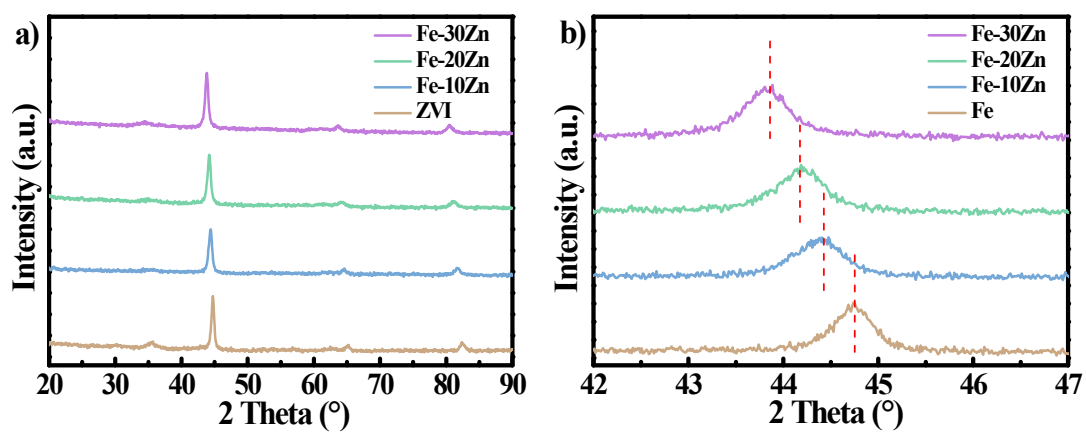

Fig. S3 XRD patterns with different electrolyte composition.

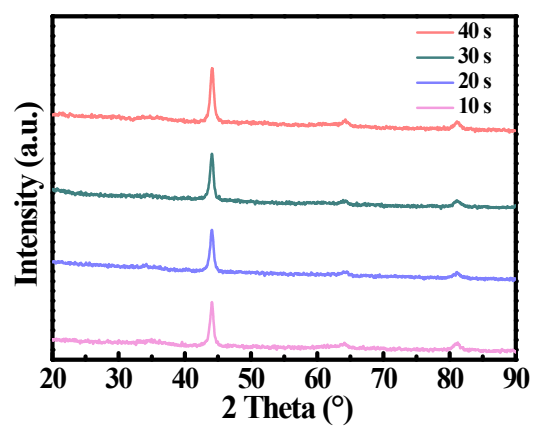

Fig. S4 XRD patterns with different deposition time.

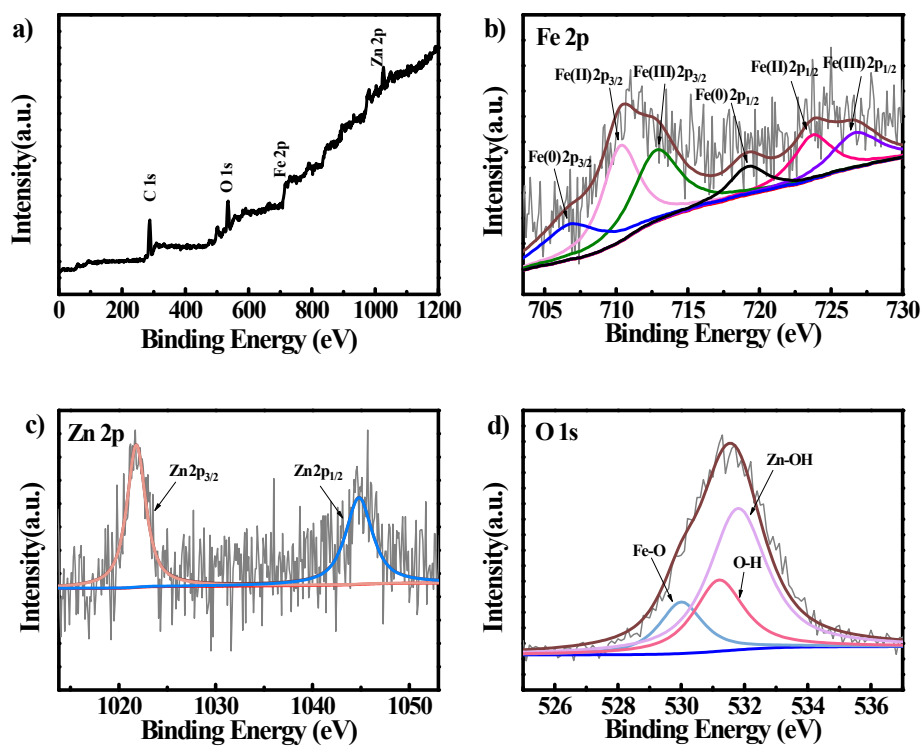

Fig. S5 XPS spectra of Fe-20Zn: (a) wide scan, (b) Fe2p (c) Zn2p, and (d) O1s.

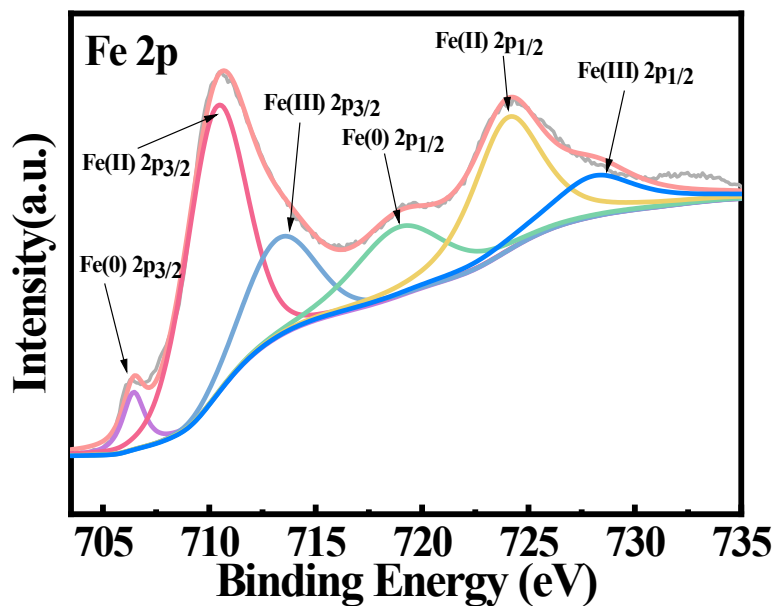

Fig. S6 High-resolution Fe 2p XPS spectrum of ZVI

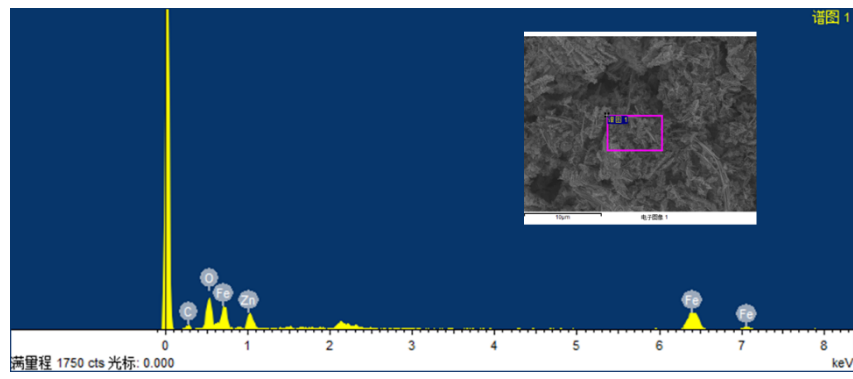

**Fig. S7** EDS spectrum of Fe-20Zn

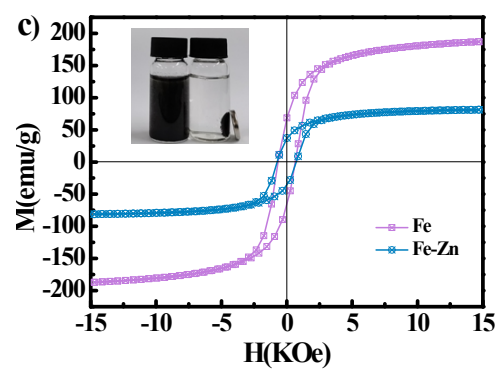

**Fig. S8** The hysteresis loops of Fe and Fe-20Zn.



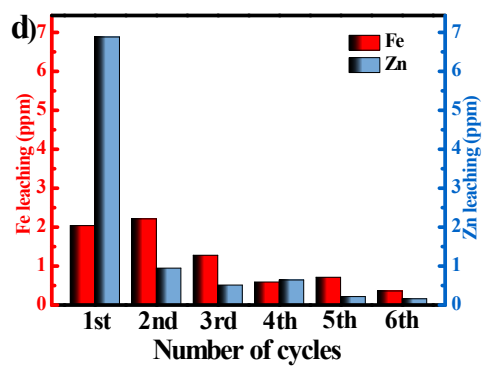

**Fig. S9** Iron and zinc leaching amount in six cycles.

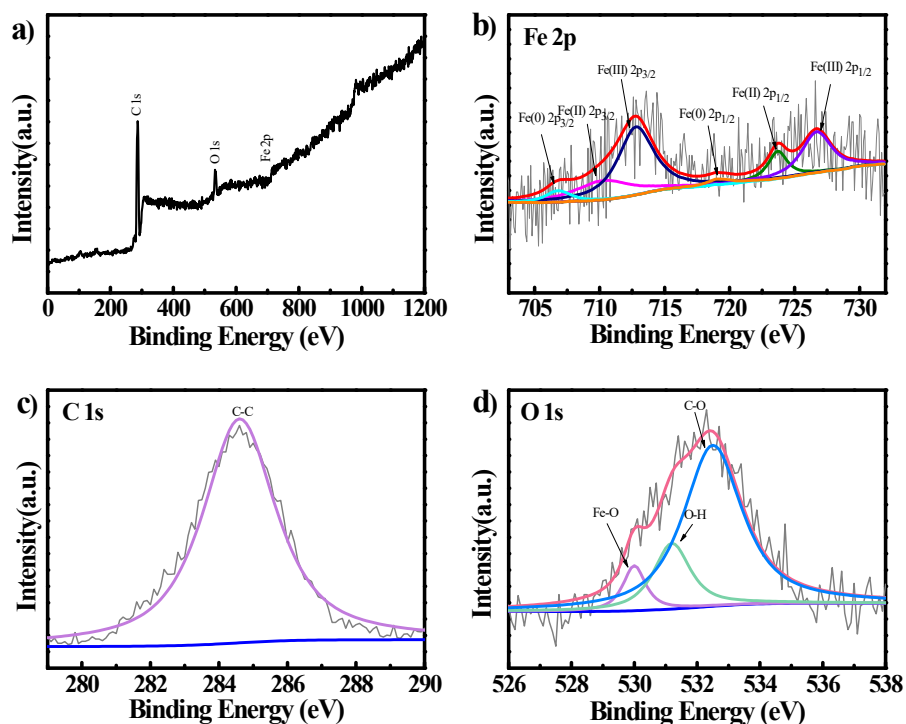

**Fig. S10** XPS spectra of used Fe-20Zn: (a) wide scan, (b) Fe2p (c) C1s, and (d) O1s.

**Table S1** Comparison of phenol degradation performance with previous studies

| Catalysts | Catalyst |              | Phenol concentration (mg/L) | H <sub>2</sub> O <sub>2</sub> dosage (mM) | Time (min) | Efficiency (%) | External energy | Ref.      |
|-----------|----------|--------------|-----------------------------|-------------------------------------------|------------|----------------|-----------------|-----------|
|           | pH       | Dosage (g/L) |                             |                                           |            |                |                 |           |
| E100      | 4.0      | 0.1          | 35                          | 6                                         | 60         | 99%            | -               | [1]       |
| IB-350    | 3.6      | 1.0          | 100                         | 45                                        | 35         | 99%            | -               | [2]       |
| RFAM      | 6.0      | 0.5          | 100                         | 10                                        | 60         | 95%            | light           | [3]       |
| N-AC/ZVI  | 3.0      | 1.0          | 150                         | 22                                        | 60         | 80%            | -               | [4]       |
| Fe-20Zn   | 4.0      | 0.1          | 30                          | 6                                         | 20         | 100%           | -               | This work |

## References

- [1] Xia Q, Zhang D, Yao Z, et al. Revealing the enhancing mechanisms of Fe–Cu bimetallic catalysts for the Fenton-like degradation of phenol[J]. *Chemosphere*, 2022,

289: 133195.

[2] Jin M, Long M, Su H, et al. Magnetically separable maghemite/montmorillonite composite as an efficient heterogeneous Fenton-like catalyst for phenol degradation[J]. Environmental Science And Pollution Research, 2017, 24(2): 1926-1937.

[3] Wang Y, Liang M, Fang J, et al. Visible-light photo-Fenton oxidation of phenol with rGO- $\alpha$ -FeOOH supported on Al-doped mesoporous silica (MCM-41) at neutral pH: Performance and optimization of the catalyst[J]. Chemosphere, 2017, 182: 468-476.

[4] Messele S, Soares O, Órfão J, et al. Zero-valent iron supported on nitrogen-containing activated carbon for catalytic wet peroxide oxidation of phenol[J]. Applied Catalysis B: Environmental, 2014, 154: 329-338.
